# Supplementary material for: Immunogenicity of stabilized HIV-1 Env trimers delivered by self-amplifying mRNA
Source: PubMed Central journal article supplement — Mol Ther Nucleic Acids. 2021 Jun 24;25:483–93. doi: 10.1016/j.omtn.2021.06.008 (PMC8463288; doi:10.1016/j.omtn.2021.06.008), 2021-06-24
Supplement: mmc1.pdf [file mmc1.pdf]

OMTN, Volume 25

## **Supplemental information**

### **Immunogenicity of stabilized HIV-1 Env trimers delivered by self-amplifying mRNA**

**Yoann Aldon, Paul F. McKay, Jorge Moreno Herrero, Annette B. Vogel, Réka Lévai, Pauline Maisonnasse, Nathalie Dereuddre-Bosquet, Heinrich Haas, Katalin Fábíán, Roger Le Grand, Ugur Sahin, and Robin J. Shattock**

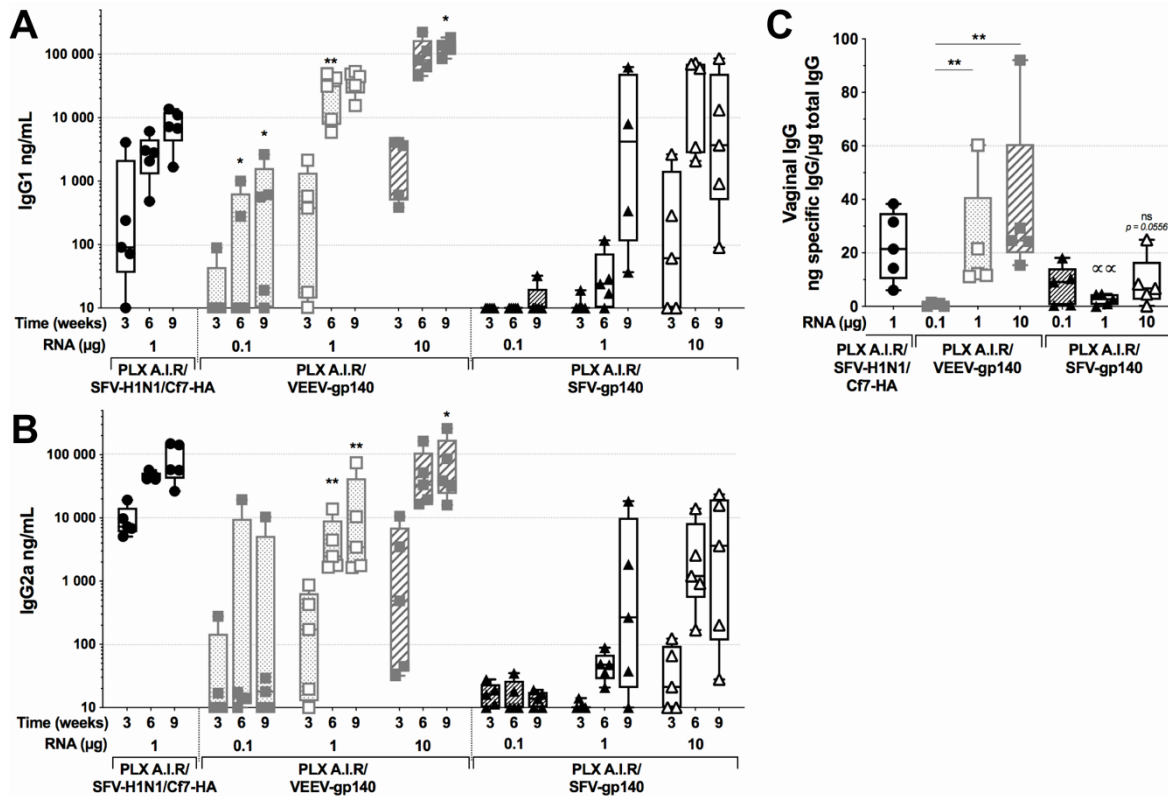

**Supplementary Figure 1. Comparison of VEEV- and SFV-based saRNA. Related to Figure 2.** Groups of  $n = 5$  BALB/c mice were immunized 3 times 3 weeks apart with escalating doses of polymer formulated (PLX) VEEV-based saRNA encoding the ConSOSL.UFO.664 gp140 protein (PLX A.I.R./VEEV-gp140) and compared to a SFV-based saRNA platform (PLX A.I.R./SFV-gp140). A PLX A.I.R./SFV-H1N1/Cf7-HA was included as a positive control group. **(A)** Antigen-specific IgG1 and **(B)** IgG2a titers as determined by ELISA. **(C)** The antigen-specific vaginal IgG was determined by ELISA. For **(A)**, **(B)** and **(C)**, box and whiskers with median, min-max and 25<sup>th</sup>-75<sup>th</sup> percentile. For **(A)** and **(B)**, the indicated  $p$  values compare VEEV to SFV for each week and each specific RNA dose. In **(C)**,  $p$  values indicated by arrows compare VEEV to SFV for each week and each specific RNA dose. Mann-Whitney unpaired t-test,  $p$  values:  $* < 0.05$ ,  $** < 0.01$  and  $\alpha\alpha < 0.01$ . ns, non-significant.
